# Supplementary material for: Morphogen and community effects determine cell fates in response to BMP4 signaling in human embryonic stem cells
Source: Oxford University Press journal article supplement (doi:10.1242/dev.153239), 2017-01-01
Supplement: dev153239supp.pdf [file dev153239supp.pdf]

## Supplemental Material

## Supplemental Figures

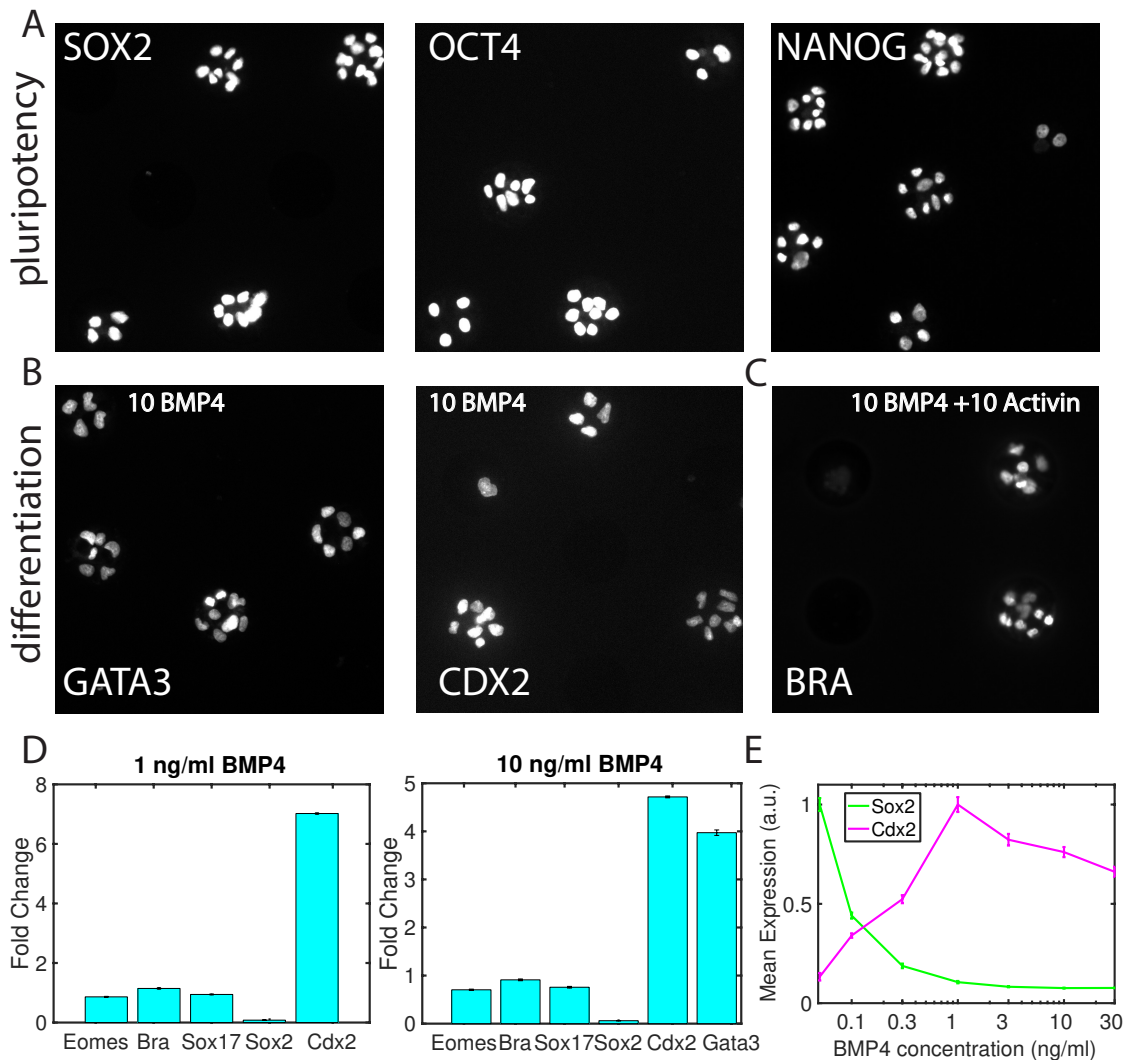

## FIGURE S1

**Figure S1. Stem cells in  $\mu$ Colonies express pluripotency markers and differentiate to a single fate in response to BMP4 stimulation.** (A) Representative immunofluorescence images for SOX2, OCT4 and NANOG in pluripotent conditions. (B-C) Representative immunofluorescence images for (B) GATA3 and CDX2 upon differentiation with 10 ng/ml BMP4 and (C) BRA upon differentiation with 10 ng/ml BMP4 and 10 ng/ml Activin. Scale bar 50 $\mu$ m. (D) Mean fold change in the indicated genes upon differentiation with either 1 ng/ml or 10 ng/ml BMP4. (E) Mean levels of SOX2 and CDX2 as a function of BMP4 dose. The levels were normalized to the maximum. Each data point represents the average over thousands of cells on a separate micropattern. Here and in all data below, SOX2 and CDX2 intensities are normalized to DAPI signal in each cell. Error bars represent standard error of the mean.

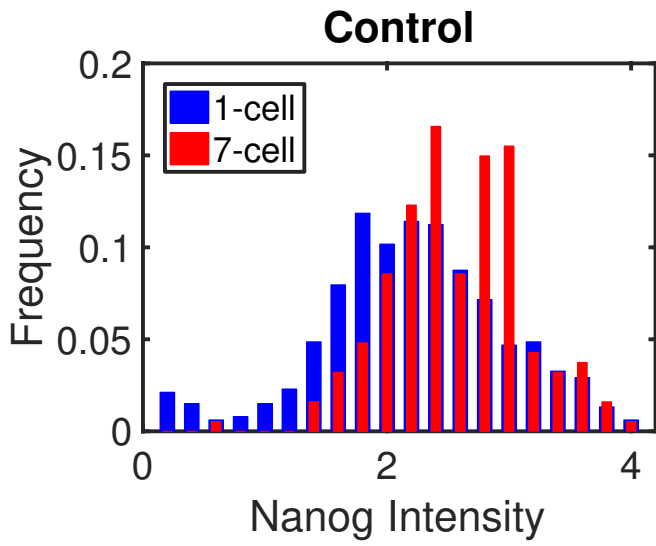

Figure S2

**Figure S2. NANOG marker shows community effect in pluripotent conditions.** Distributions of NANOG intensity in one- and seven-cell colonies for cells grown in pluripotent conditions.

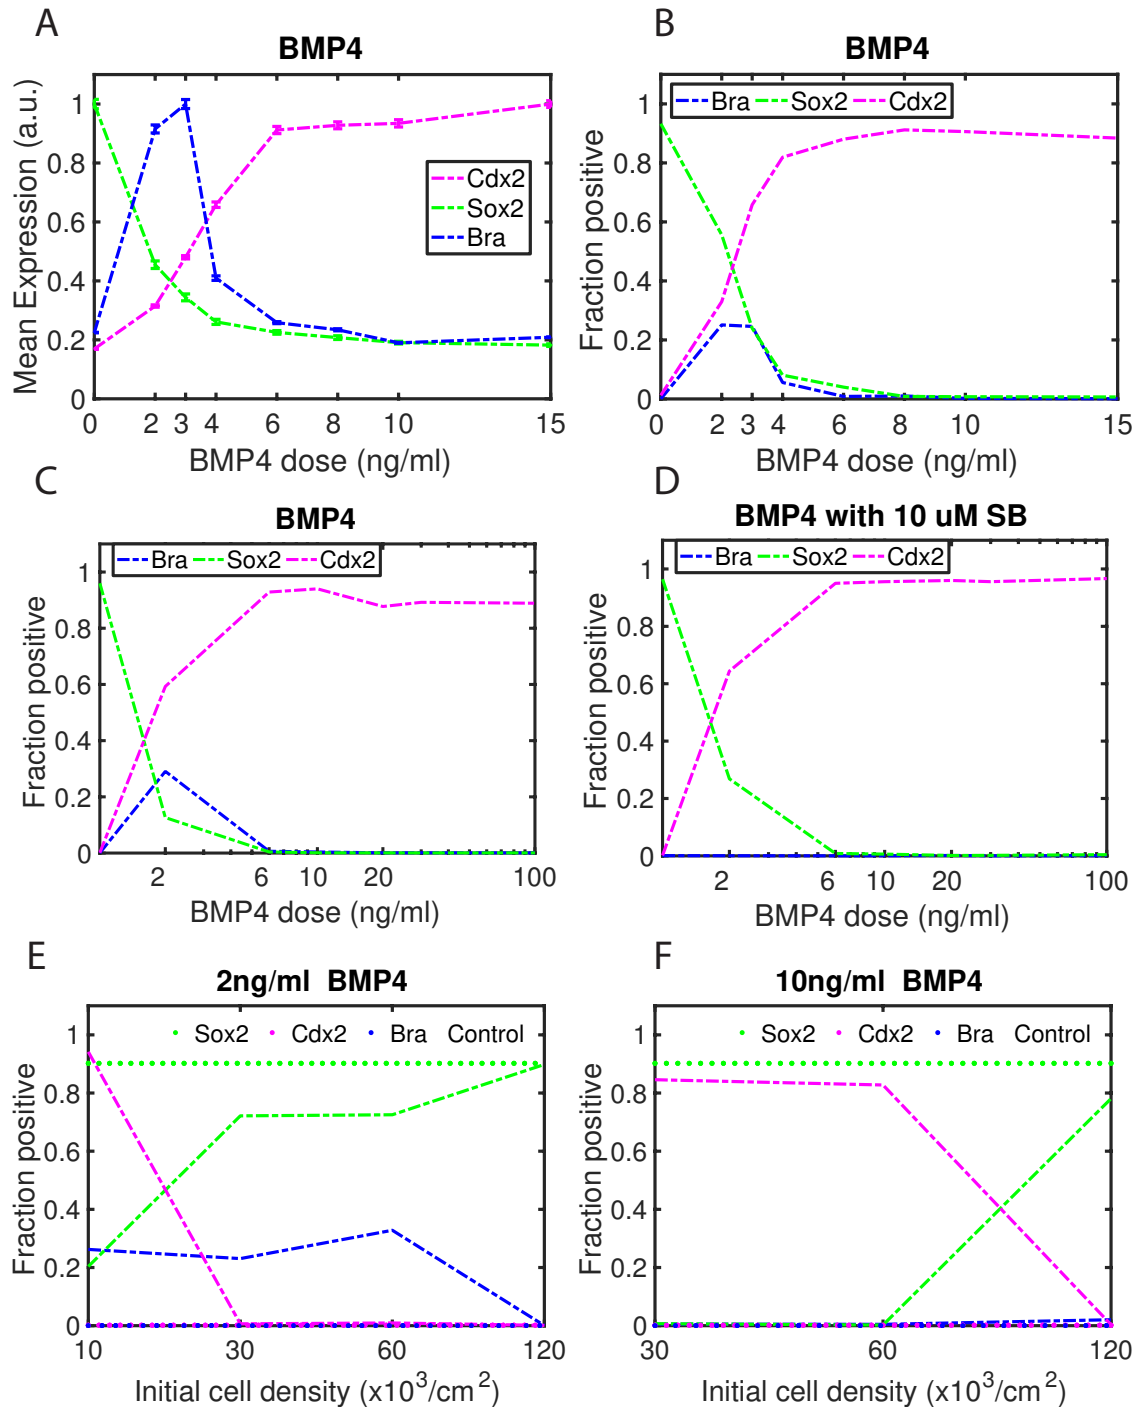

## FIGURE S3

**Figure S3. In standard culture, expression of BRA in response to BMP4 requires Nodal signaling and specific cell densities.** (A) Mean levels of SOX2, BRA and CDX2 and (B) fractions of SOX2, BRA and CDX2 positive cells upon treatment with BMP4 in the range of 0-15 ng/ml. (C)-(F) Fraction of cells expressing SOX2, CDX2 or BRA under the indicated conditions. These represent the same experiments for which the mean expression of each marker is shown in Figure 2.

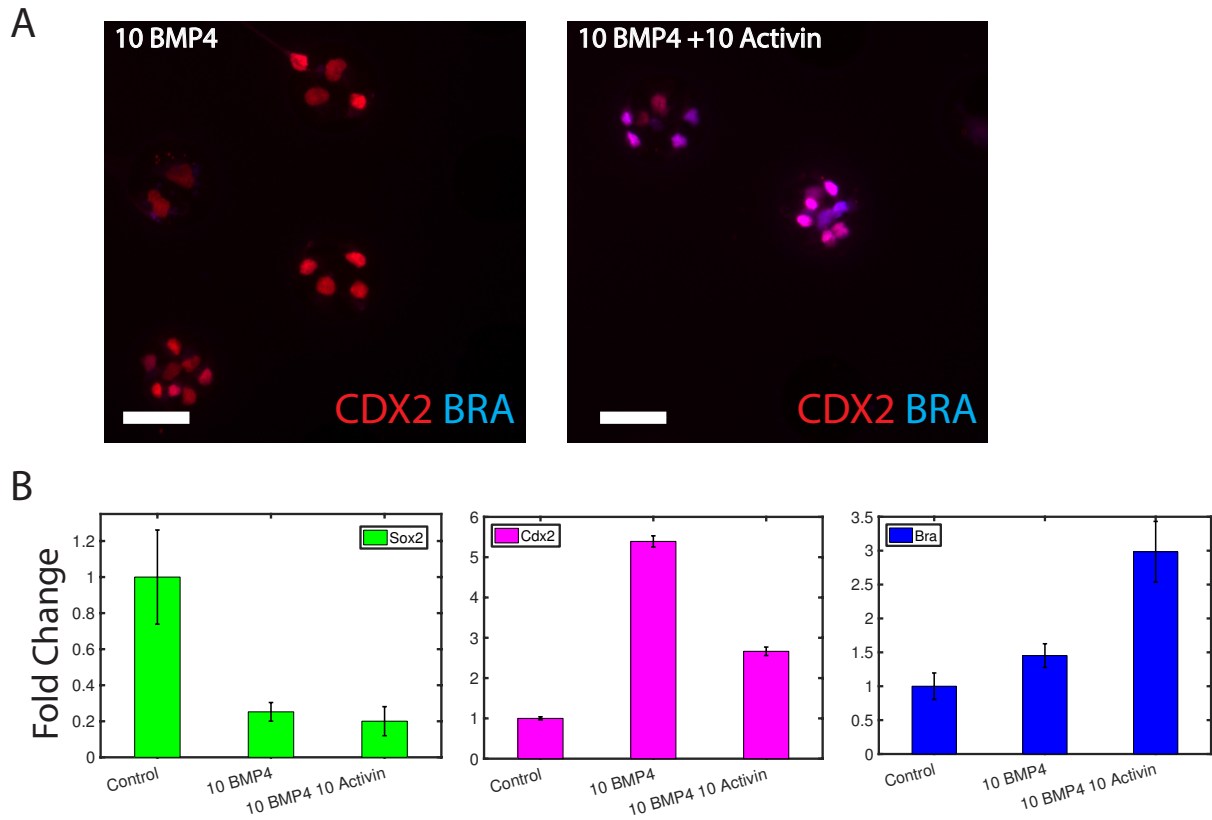

## FIGURE S4

**Figure S4. Activin treatment during BMP4-mediated differentiation induces BRA expression in  $\mu$ Colonies.** (A) Representative images of CDX2 and BRA expression in  $\mu$ Colonies treated either with 10 ng/ml of BMP4 alone or 10 ng/ml BMP4 with 10 ng/ml Activin. Scale bar 50  $\mu$ m. (B) Fold changes in expression of SOX2, CDX2 and BRA in these conditions. Error bars represent standard error of the mean.

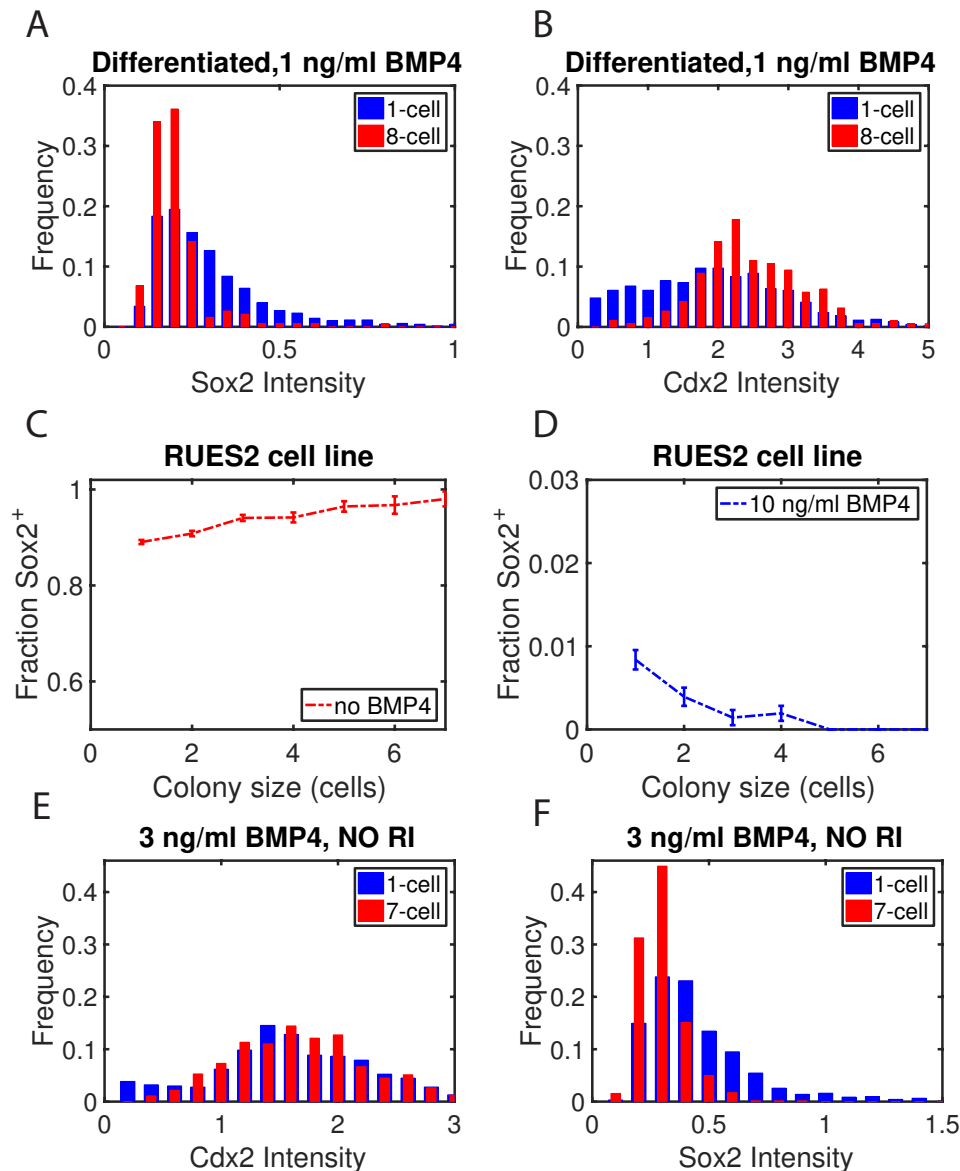

## FIGURE S5

**Figure S5. Cells show the community effect in the differentiated conditions, in a different cell line, and independently of presence of Rock-inhibitor.** (A)-(B) Distributions of SOX2 and CDX2 markers in  $\mu$ Colonies upon BMP4 differentiation are long-tailed. Distributions of SOX2 (A) and CDX2 (B) in cells treated with 1 ng/ml BMP4 for the indicated colony sizes. (C)-(D) Community effect in RUES2 cells. Fraction of SOX2 expressing cells in pluripotency (C) or differentiation (D) conditions. Error bars represent standard error of the mean. (E)-(F) Differentiated cells in  $\mu$ Colonies retain community effect regardless of Rock-inhibitor (RI) in the media. Distributions of CDX2 (E) and SOX2 (F) markers in one- and seven-cell colonies upon differentiation with 3 ng/ml BMP4 but without Rock-inhibitor (Y27632) in the media. Compare to the distributions in Figure 3B and Figure S2.

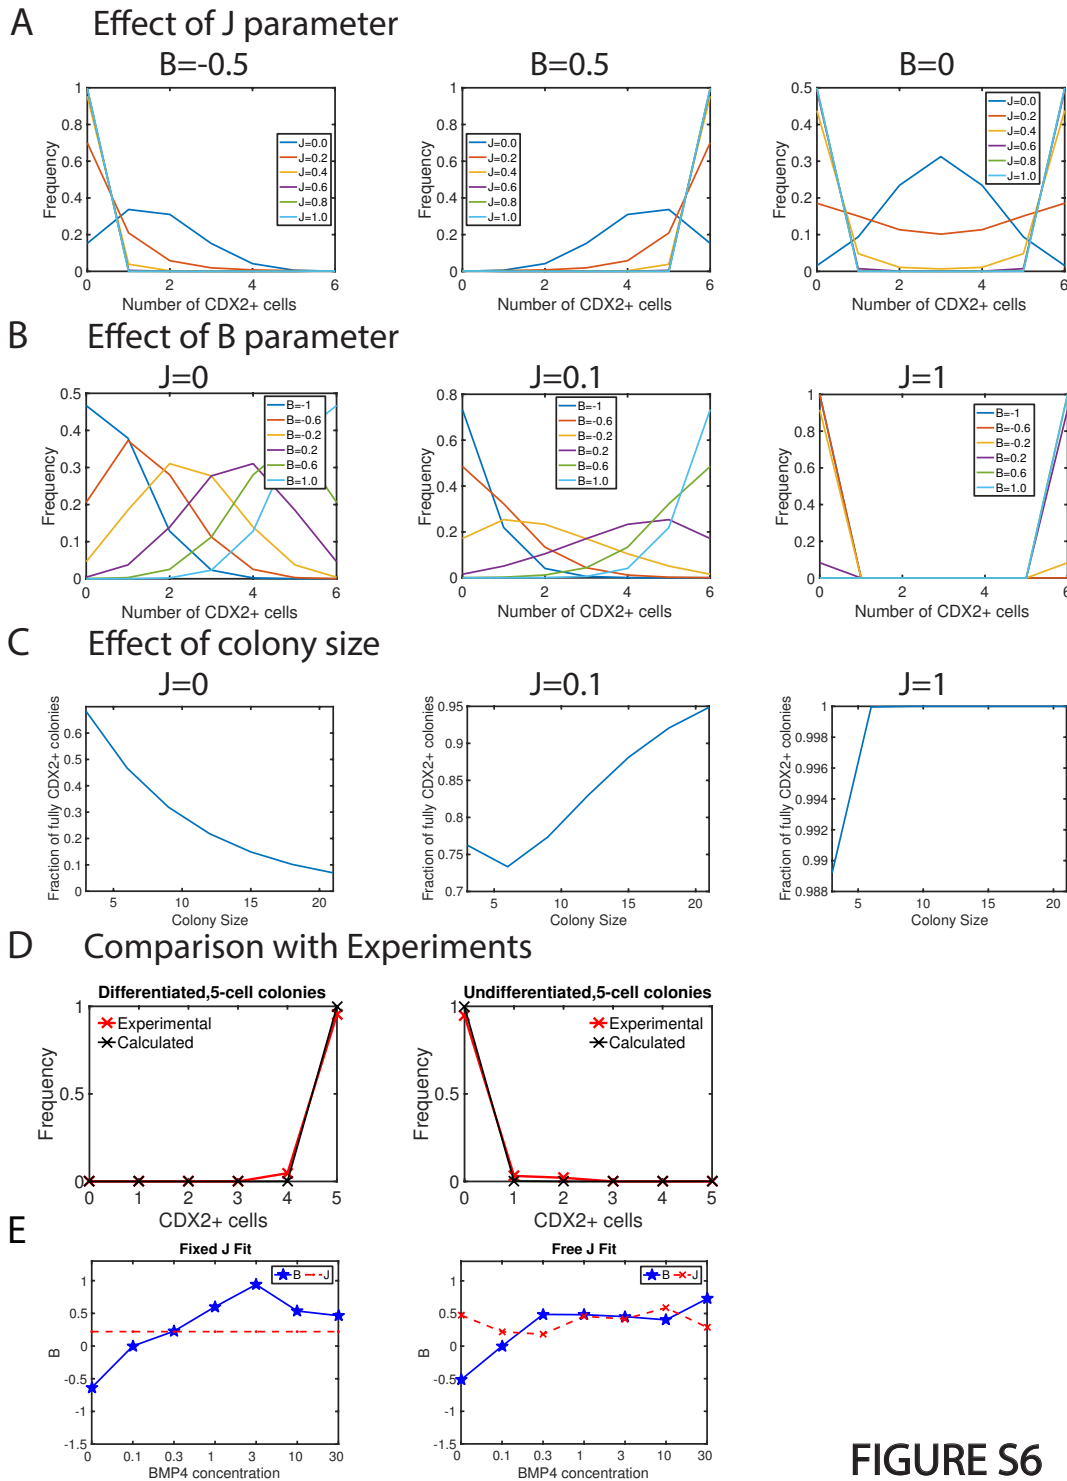

**FIGURE S6**

**Figure S6. Response of the model to variations in model parameters and comparison with experimental data** (A) For the indicated value of the B parameter, the J parameter was varied and the distribution of the number of CDX2+ cells in 6 cell colonies was plotted. (B) For the indicated value of the J parameter, the B parameter was varied and the distribution of the number of CDX2+ cells in 6 cell colonies was plotted (C) For the value B = 0.1 and the indicated value of J, the colony size was varied and the fraction of colonies that were entirely CDX2+ was plotted. (D) Comparison between experimental data and calculated distributions of CDX2+ cells for 5-cell  $\mu$ Colonies. Parameters were those used to fit the data in Figure 3C without adjustment. (E) The fitted values of B and J are plotted as a function BMP concentration. In the left panel, the value of J was held fixed while in the right it was allowed to vary.  $\chi^2$  statistic was 1.40 for the fixed J case and 1.16 for the variable J case.

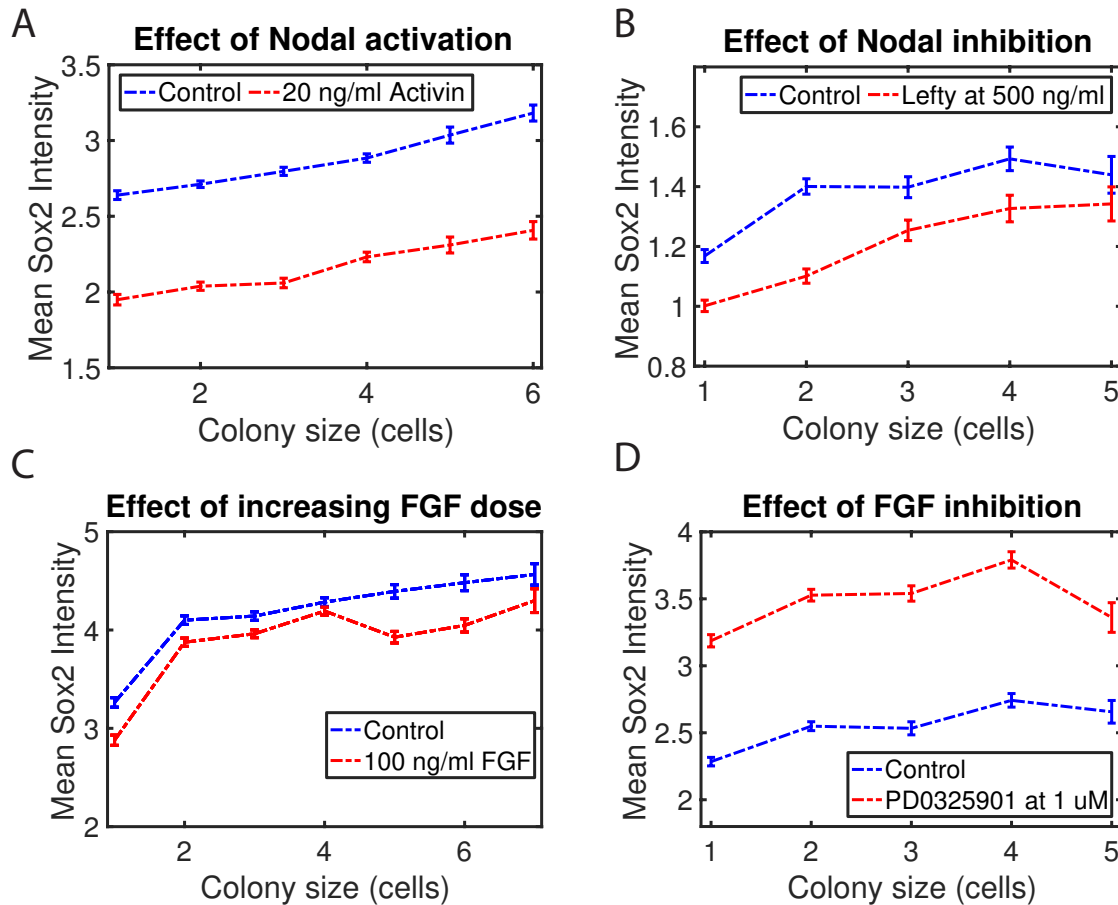

## FIGURE S7

**Figure S7. Manipulation of pluripotency supporting pathways in  $\mu$ Colonies** (A) Mean expression of SOX2 marker as a function of colony size in  $\mu$ Colonies upon additional Nodal activation with 20 ng/ml Activin. (B) Mean expression of SOX2 marker as a function of colony size in  $\mu$ Colonies upon inhibition of Nodal with Lefty (500 ng/ml). (C) Mean expression of SOX2 marker as a function of colony size upon activation of the FGF pathway with additional bFGF (100 ng/ml). (D) Mean expression of SOX2 marker as a function of colony size in undifferentiated conditions upon FGF pathway inhibition (via MEK1/2 inhibition using 1  $\mu$ M of PD0325901). In all panels the error bars represent standard error of the mean for each colony size. Colony sizes that contributed less than 100 cells were not considered.

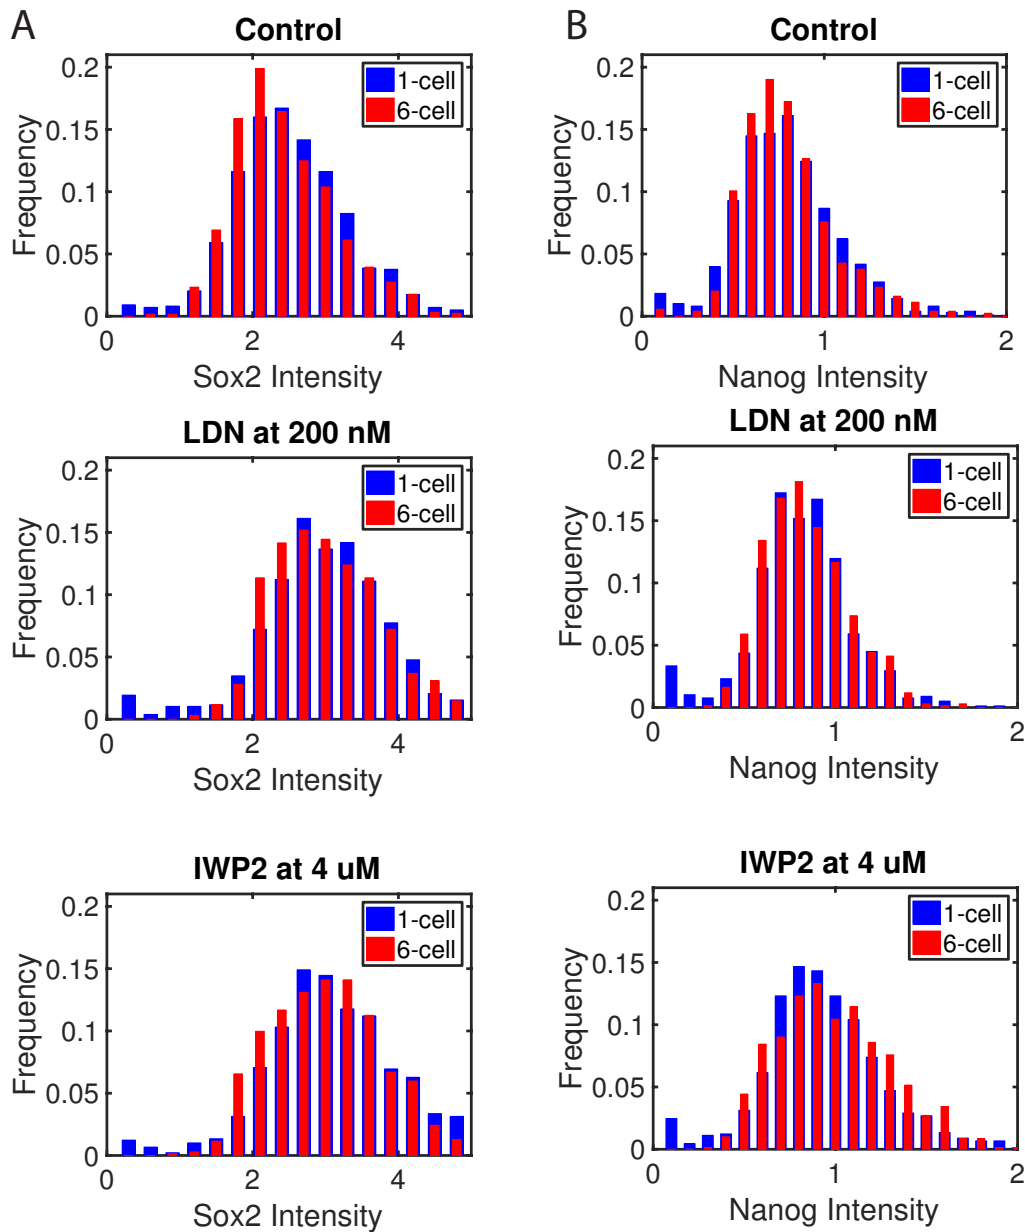

## FIGURE S8

**Figure S8. Inhibition of BMP4 or Wnt pathways does not influence the community effect in pluripotent conditions.** Distributions for cells expressing SOX2 (column A) or NANOG (column B) in control cells or with inhibition of BMP4 signaling via LDN193189 (200nM) or Wnt signaling via IWP2 (4 $\mu$ M). All treatments show a subpopulation of cells that spontaneously differentiate in 1 cell colonies but not in 6-cell colonies.



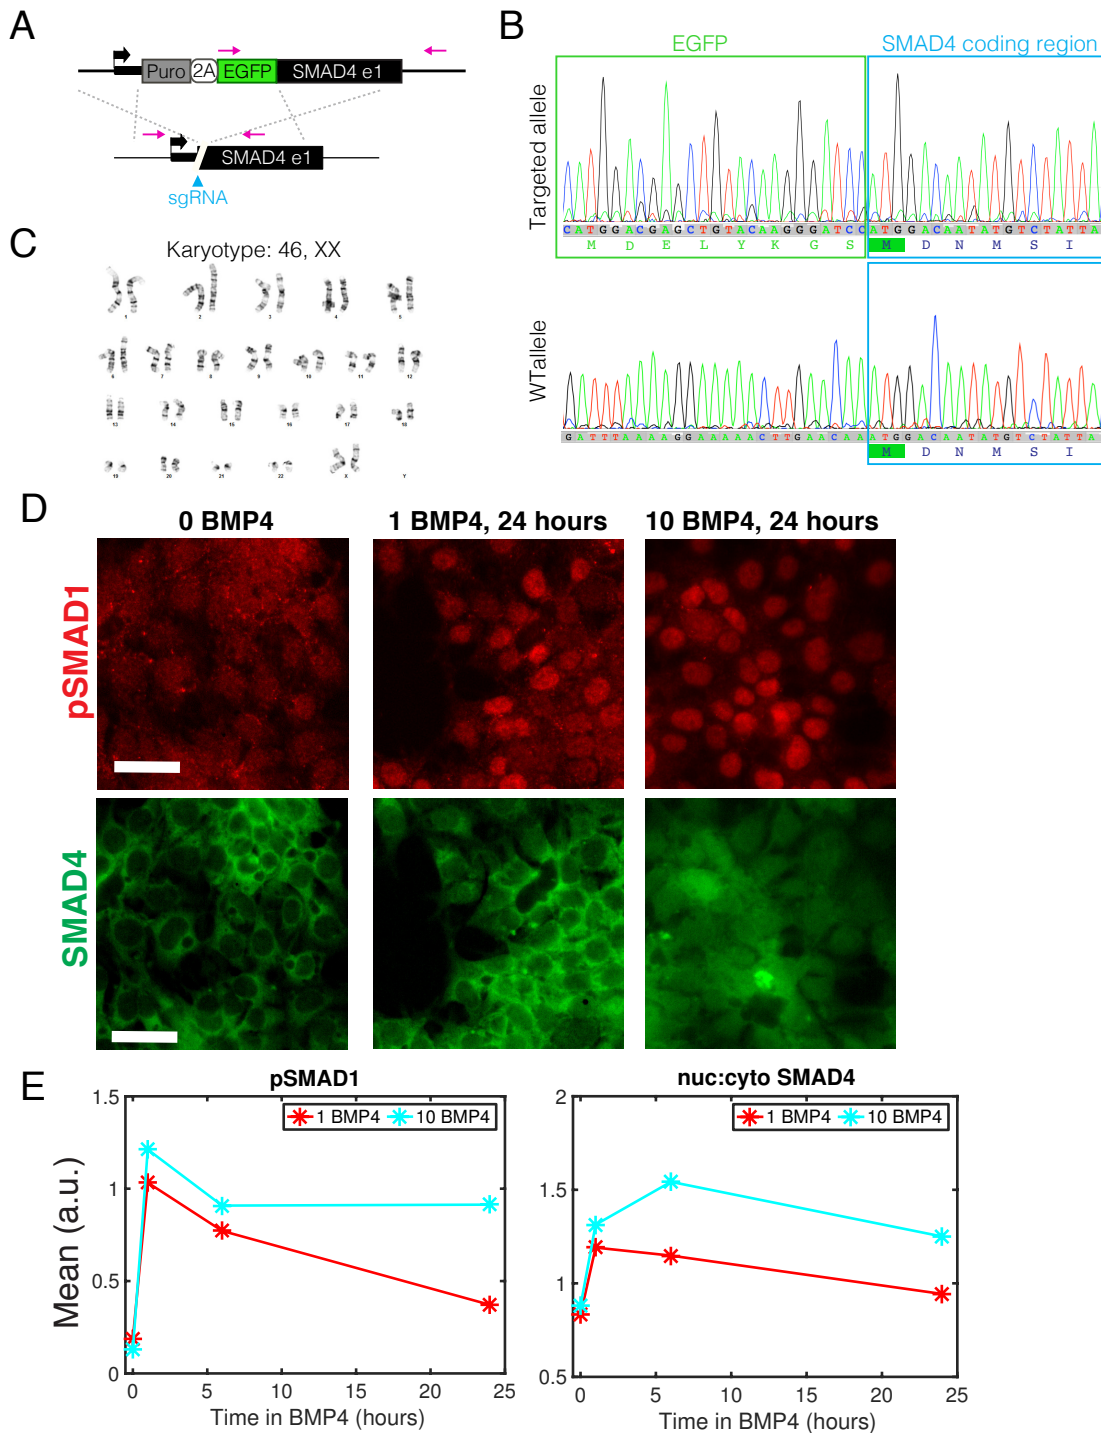

FIGURE S9

**Figure S9. Characterization of the GFP-SMAD4 reporter cell line.** (A) Schematic of the modification of the endogenous Smad4 locus used to create the RUES2-GFP-SMAD4 cell line via CRISPR/Cas9 genome engineering. (B) Sequencing revealed correct integration of EGFP into one allele and an unmodified second allele. (C) The resulting line possessed a normal karyotype. (D) Representative images for pSMAD1 and SMAD4 staining at various time points during differentiation with low (1 ng/ml) or high (10 ng/ml) BMP4 doses. Scale bar 50  $\mu$ m. (E) The mean intensity of pSMAD1 staining and the GFP-SMAD4 nuclear to cytoplasmic ratios were determined at the indicated times.

**Table S1. Primary antibodies and dilutions**

| <b>Antibody</b> | <b>Vendor</b>               | <b>Catalogue number</b> | <b>Dilution</b> |
|-----------------|-----------------------------|-------------------------|-----------------|
| SOX2            | Cell Signaling Technologies | Cat# 5024S              | 1:200           |
| CDX2            | BioGenex                    | Cat# MU392A             | 1:100           |
| CDX2            | Abcam                       | Cat# ab15258            | 1:50            |
| NANOG           | BDBiosciences               | Cat# 560482             | 1:400           |
| OCT4            | BDBiosciences               | Cat# 611203             | 1:400           |
| phosphoSMAD1    | Cell Signaling Technologies | Cat# 13820              | 1:200           |
| BRACHYURY       | R&D Systems                 | Cat# AF2085             | 1:300           |
| EOMES           | Abcam                       | Cat# ab23345            | 1:200           |
| GATA3           | Thermofisher                | Cat# PA1-101            | 1:500           |

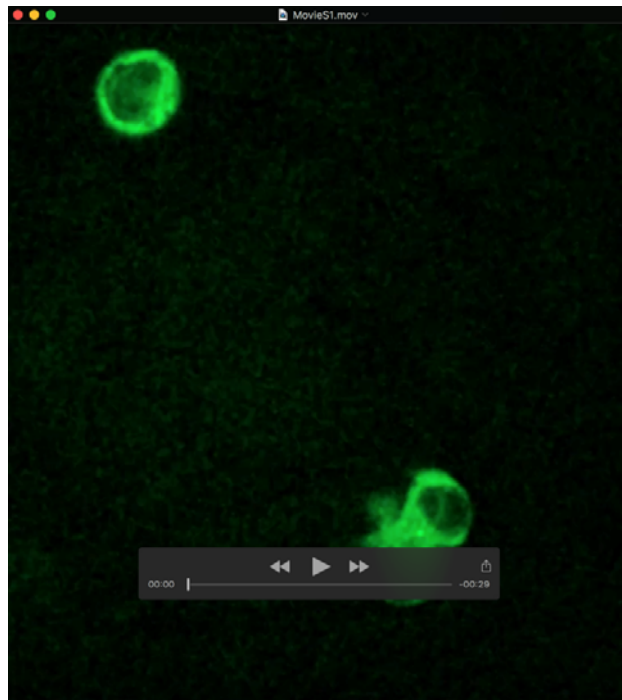

**Movie S1. Smad4 signaling in one- and two-cell  $\mu$ Colonies.** BMP4 is added in frame 10. Time interval is 12 minutes. Total movie length is 17.4 hours (2 hours in MEF-CM alone and the remaining 15.4 hours - in MEF-CM + 10 ng/ml BMP4).
